# Supplementary material
Source: PubMed Central journal article supplement (PMC5763485)

**Panel A**

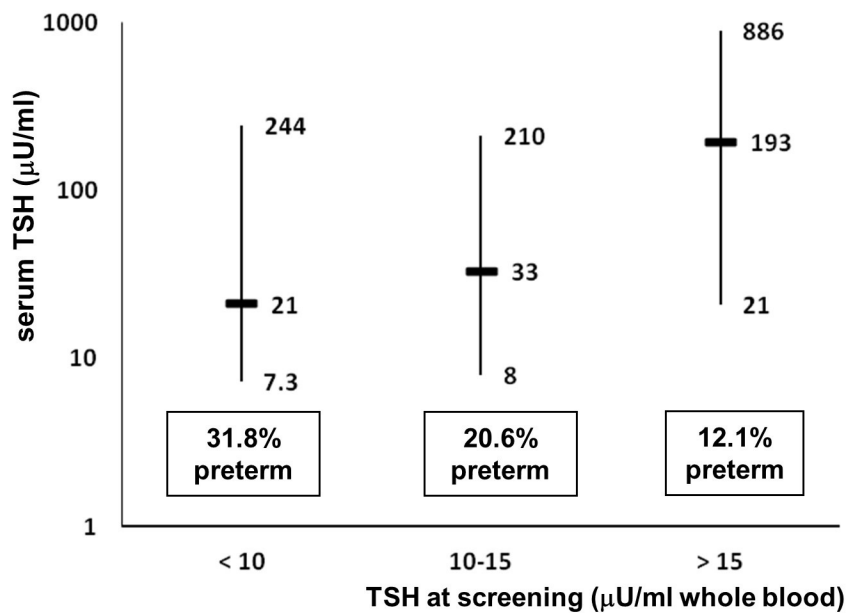

**Panel B**

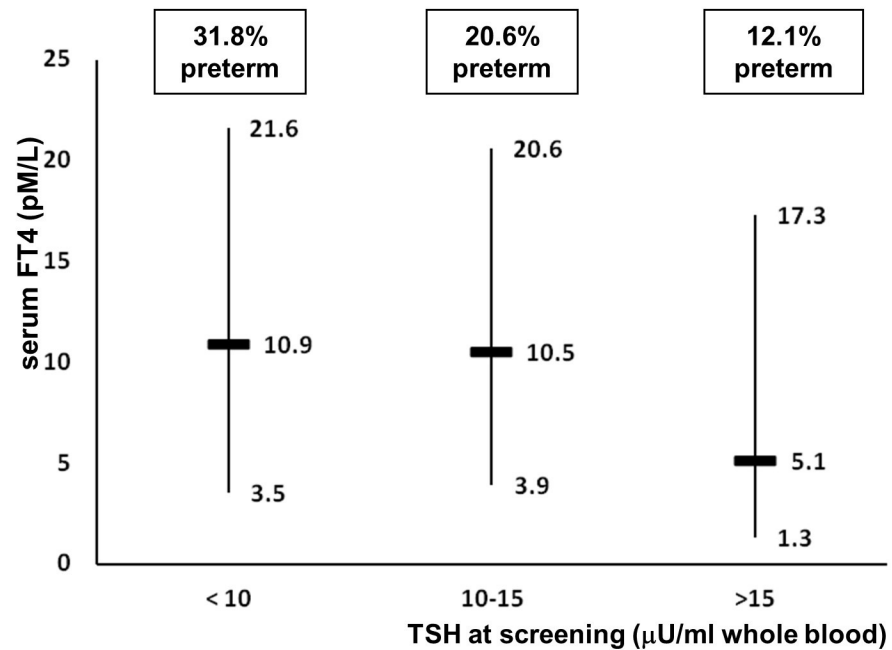

Supplement: NIHMS931606-supplement-Figure_1.pdf [file NIHMS931606-supplement-Figure_1.pdf]
